# Supplementary material for: Berry plant abundance but not occupancy may decline under climate change: Predicting future conditions and promoting resilience in Southeast Alaskan forests
Source: Research Square preprint supplement (doi:10.21203/rs.3.rs-6515477/v1), 2025-05-15
Supplement: Supplementary file 1 [file 34c1a8251b4fb0526d9cfb5d.pdf]

## SUPPLEMENTAL INFORMATION

**Table S1** Category (Type), abbreviated name, description, source, and original resolution of predictors included in the ensemble SDMs for occupancy (climatic and topographic) and GAMs for cover (climatic, topographic, and stand attributes) of blueberry and salmonberry.

| Type                            | Abbreviation     | Description                                                       | Source & Original Resolution                                                             |
|---------------------------------|------------------|-------------------------------------------------------------------|------------------------------------------------------------------------------------------|
| Climatic                        | AHM              | annual heat-moisture index $(MAT+10)/(MAP/1000)$                  | ClimateNA v7.50:<br>Wang et al. 2016;<br>Mahony et al. 2022,<br>Original Resolution: 1km |
|                                 | bFFP             | the day of the year on which frost-free period begins             |                                                                                          |
|                                 | CMD              | Hargreaves climatic moisture deficit (mm)                         |                                                                                          |
|                                 | CMI              | Hogg's climate moisture index (mm)                                |                                                                                          |
|                                 | cmiJJA           | summer (June-August) Hogg's climate moisture index (mm)           |                                                                                          |
|                                 | DD.0             | degree-days below 0°C, chilling degree-days                       |                                                                                          |
|                                 | DD.5             | degree-days above 5°C, growing degree-days                        |                                                                                          |
|                                 | eFFP             | the day of the year on which frost-free period ends               |                                                                                          |
|                                 | EMT              | extreme minimum temperature over 30 years                         |                                                                                          |
|                                 | Eref             | Hargreaves reference evaporation (mm)                             |                                                                                          |
|                                 | MAP              | mean annual precipitation (mm)                                    |                                                                                          |
|                                 | MAT              | mean annual temperature (°C)                                      |                                                                                          |
|                                 | MCMT             | mean coldest month temperature (°C)                               |                                                                                          |
|                                 | MSP              | May to September precipitation (mm)                               |                                                                                          |
|                                 | MWMT             | mean warmest month temperature (°C)                               |                                                                                          |
|                                 | NFFD             | annual number of frost-free days                                  |                                                                                          |
|                                 | PAS              | annual precipitation as snow (mm)                                 |                                                                                          |
|                                 | PPT_sm           | summer (Jun-Aug) precipitation (mm)                               |                                                                                          |
|                                 | PPT_wt           | winter (Dec-Feb) precipitation (mm)                               |                                                                                          |
|                                 | SHM              | summer heat-moisture index $((MWMT)/(MSP/1000))$                  |                                                                                          |
| Topographic                     | Tave_sm          | mean summer temperature (°C)                                      | Hijmans 2024;<br>Landfire 2020 a-f;<br>Original Resolution: 30m                          |
|                                 | Tave_wt          | mean winter temperature (°C)                                      |                                                                                          |
|                                 | TD               | continentality; temperature difference between MWMT and MCMT (°C) |                                                                                          |
|                                 | Eastness         | $\sin(\text{aspect})$ (radians)                                   |                                                                                          |
|                                 | Elevation        | elevation (m)                                                     |                                                                                          |
|                                 | Northness        | $\cos(\text{aspect})$ (radians)                                   |                                                                                          |
|                                 | Slope            | mean pixel slope (percent)                                        |                                                                                          |
| Stand Attributes<br>(GAMs Only) | TPI              | topographic position index                                        | USDA-FS 2024a;<br>USDA-FS 2024b;<br>Bechtold and Patterson 2005                          |
|                                 | TRI              | terrain ruggedness index                                          |                                                                                          |
|                                 | Forest Type      | forest type code                                                  |                                                                                          |
|                                 | Tree Cover       | tree aerial canopy cover (%)                                      |                                                                                          |
|                                 | Stand Age Class  | stand age class (50-year intervals from 0-50 to 400+)             |                                                                                          |
|                                 | Stand Size Class | stand size class                                                  |                                                                                          |
|                                 | Shrub Cover      | shrub aerial canopy cover (%)                                     |                                                                                          |



## Table S1 References

- Bechtold WA, Patterson PL (2005) The enhanced forest inventory and analysis program - national sampling design and estimation procedures. Gen. Tech. Rep. SRS-80. U.S. Department of Agriculture, Forest Service, Southern Research Station, Asheville, NC, pp. 85 p.  
<https://doi.org/10.2737/SRS-GTR-80>
- Hijmans R (2023) terra: Spatial Data Analysis. R package version 1.7-29 edn. <https://CRAN.R-project.org/package=terra>
- Landfire (2020a) CONUS Aspect (30 m).  
[https://landfire.gov/data/FullExtentDownloads?field\\_version\\_target\\_id=31&field\\_theme\\_target\\_id=9&field\\_region\\_id\\_target\\_id=4](https://landfire.gov/data/FullExtentDownloads?field_version_target_id=31&field_theme_target_id=9&field_region_id_target_id=4) [Accessed January 23, 2025]
- Landfire (2020b) CONUS Elevation (30 m).  
[https://landfire.gov/data/FullExtentDownloads?field\\_version\\_target\\_id=31&field\\_theme\\_target\\_id=9&field\\_region\\_id\\_target\\_id=4](https://landfire.gov/data/FullExtentDownloads?field_version_target_id=31&field_theme_target_id=9&field_region_id_target_id=4) [Accessed January 23, 2025]
- Landfire (2020c) CONUS Slope Percent Rise (30 m).  
[https://landfire.gov/data/FullExtentDownloads?field\\_version\\_target\\_id=31&field\\_theme\\_target\\_id=9&field\\_region\\_id\\_target\\_id=4](https://landfire.gov/data/FullExtentDownloads?field_version_target_id=31&field_theme_target_id=9&field_region_id_target_id=4) [Accessed January 23, 2025]
- Landfire (2020d) Alaska Aspect (30 m).  
[https://landfire.gov/data/FullExtentDownloads?field\\_version\\_target\\_id=31&field\\_theme\\_target\\_id=9&field\\_region\\_id\\_target\\_id=1](https://landfire.gov/data/FullExtentDownloads?field_version_target_id=31&field_theme_target_id=9&field_region_id_target_id=1) [Accessed January 23, 2025]
- Landfire (2020e) Alaska Elevation (30 m).  
[https://landfire.gov/data/FullExtentDownloads?field\\_version\\_target\\_id=31&field\\_theme\\_target\\_id=9&field\\_region\\_id\\_target\\_id=1](https://landfire.gov/data/FullExtentDownloads?field_version_target_id=31&field_theme_target_id=9&field_region_id_target_id=1) [Accessed January 23, 2025]
- Landfire (2020f) Alaska Slope Percent Rise (30 m).  
[https://landfire.gov/data/FullExtentDownloads?field\\_version\\_target\\_id=31&field\\_theme\\_target\\_id=9&field\\_region\\_id\\_target\\_id=1](https://landfire.gov/data/FullExtentDownloads?field_version_target_id=31&field_theme_target_id=9&field_region_id_target_id=1) [Accessed January 23, 2025]
- Mahony CR, Wang T, Hamann A, Cannon AJ (2022) A CMIP6 ensemble for downscaled monthly climate normals over North America. *International Journal of Climatology* 42(11):5871-5891.  
<https://doi.org/10.1002/joc.7566>
- USDA Forest Service Forest Inventory and Analysis [USDA-FS] (2024a) FIA DataMart.  
<https://research.fs.usda.gov/products/dataandtools/fia-datamart> [Accessed March 3, 2025].
- USDA Forest Service Forest Inventory and Analysis [USDA-FS] (2024b) Forest Inventory and Analysis national core field guide for the nationwide forest inventory, v. 9.4.  
[https://research.fs.usda.gov/sites/default/files/2024-09/wo-v9-4\\_sep2024\\_fg\\_nfi\\_natl.pdf](https://research.fs.usda.gov/sites/default/files/2024-09/wo-v9-4_sep2024_fg_nfi_natl.pdf) [Accessed March 3, 2025].
- Wang, T.; Hamann, A.; Spittlehouse, D.; Carroll C. 2016. Locally Downscaled and Spatially Customizable Climate Data for Historical and Future Periods for North America. *PLoS ONE* 11(6): e0156720. <https://doi.org/10.1371/journal.pone.0156720>



**Table S2** Mean and standard error of relative importance values for each term retained in the ensemble SDMs for blueberry and salmonberry occurrence. See Table S1 for full term names and descriptions.

|             |           | Variable Importance |             |
|-------------|-----------|---------------------|-------------|
|             |           | <i>Mean</i>         | <i>SE</i>   |
| Blueberry   | SHM       | 0.4396              | 0.0013      |
|             | Eref      | 0.1105              | 0.0006      |
|             | bFFP      | 0.0849              | 0.0004      |
|             | TD        | 0.0813              | 0.0003      |
|             | PPT_sm    | 0.0459              | 0.0002      |
|             | AHM       | 0.0437              | 0.0002      |
|             | Northness | 0.0107              | 1.33465E-05 |
|             | Eastness  | 0.0107              | 6.10531E-06 |
|             | Slope     | 0.0005              | 2.13194E-06 |
|             | TPI       | 0.0003              | 2.29654E-06 |
| Salmonberry | bFFP      | 0.2908              | 0.0008      |
|             | cmiJJA    | 0.2204              | 0.0008      |
|             | Eastness  | 0.1051              | 0.0001      |
|             | Northness | 0.0974              | 0.0001      |
|             | TD        | 0.0614              | 0.0002      |
|             | Tave_sm   | 0.0395              | 0.0002      |
|             | SHM       | 0.0384              | 0.0001      |
|             | MAP       | 0.0222              | 6.10455E-05 |
|             | TRI       | 0.0007              | 4.63575E-06 |
|             | Slope     | 0.0007              | 4.04137E-06 |



Climate Normals (1991-2020)

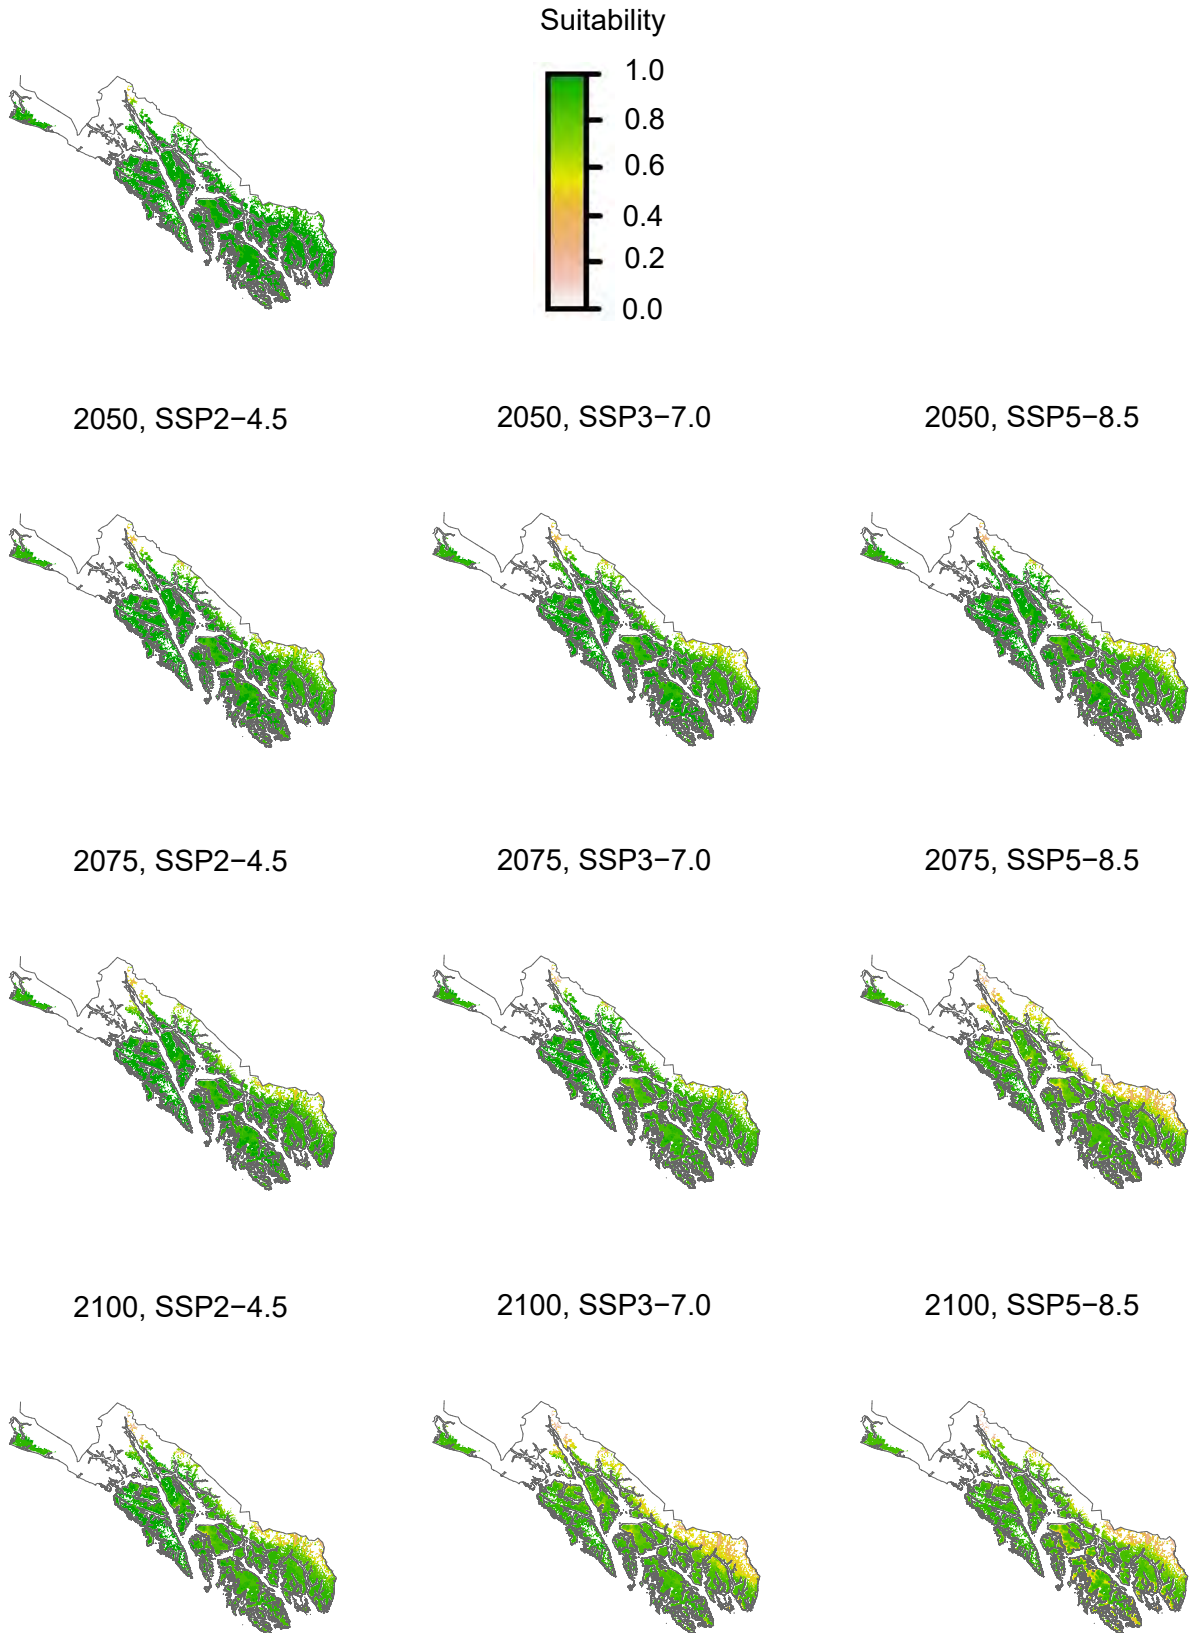

**Fig S1** Maps of projected suitability for blueberry occurrence in forested areas of the Tongass National Forest under historical climate normals and each SSP for all years examined.



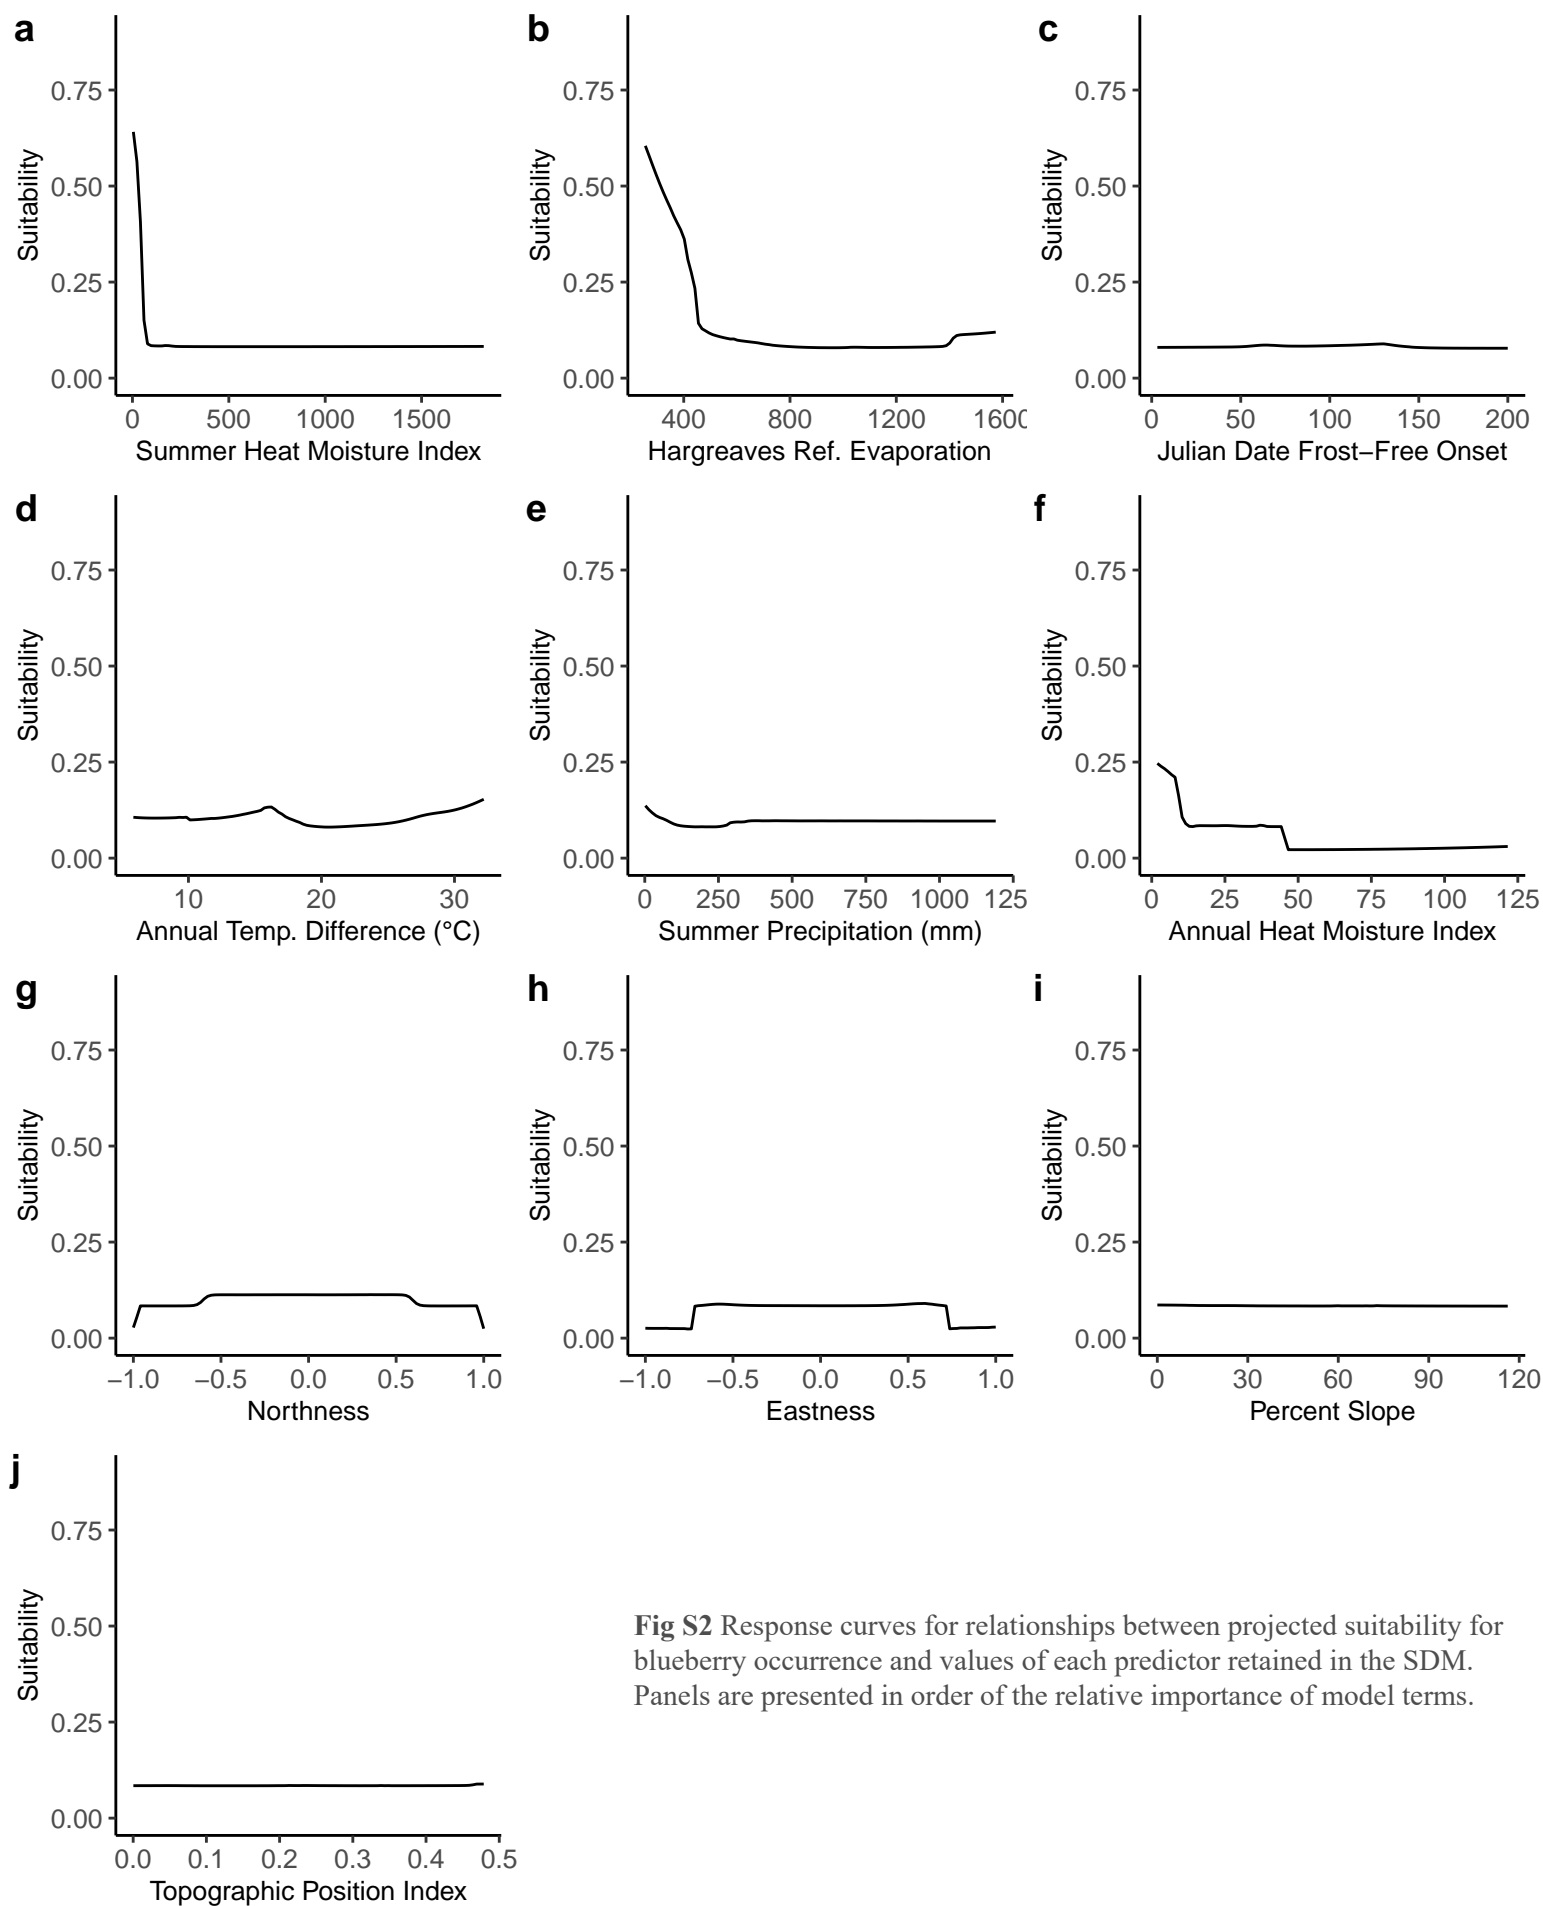

**Fig S2** Response curves for relationships between projected suitability for blueberry occurrence and values of each predictor retained in the SDM. Panels are presented in order of the relative importance of model terms.



Climate Normals (1991–2020)

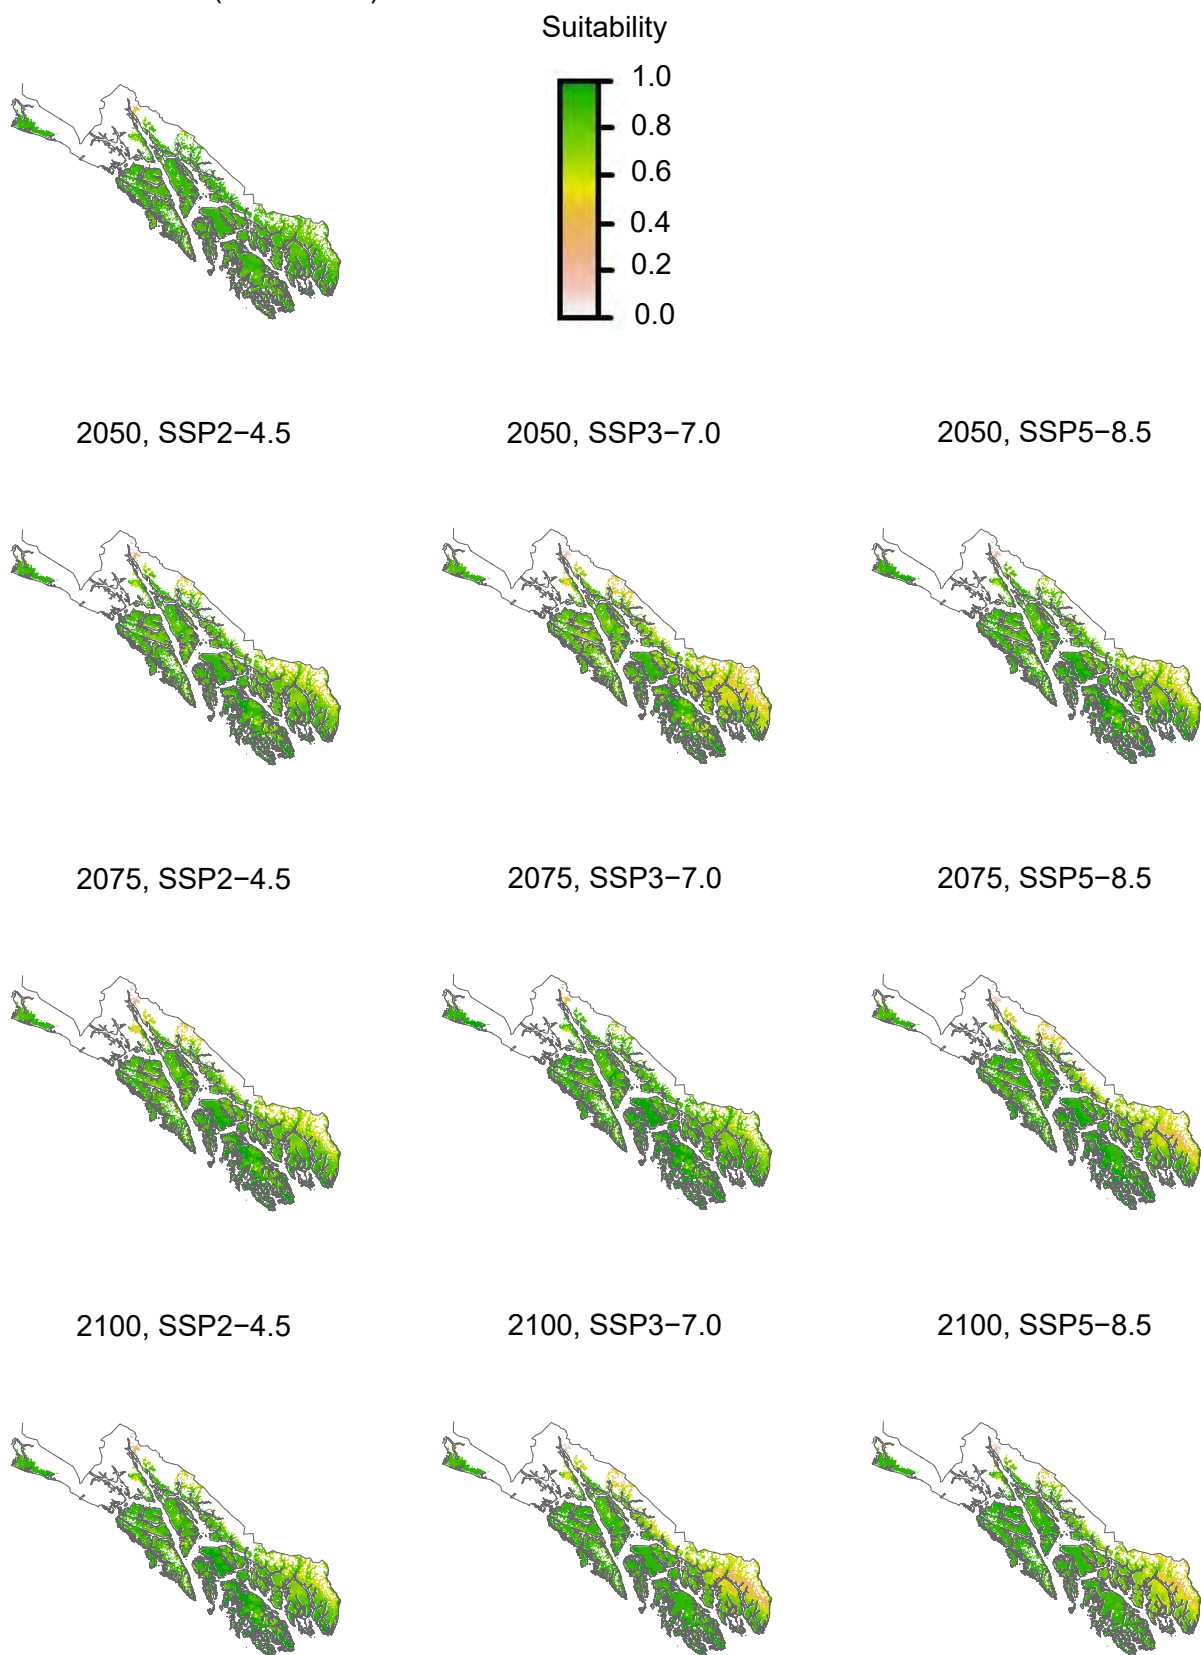

**Fig S3** Maps of projected suitability for salmonberry occurrence in forested areas of the Tongass National Forest under historical climate normals and each SSP for all years examined.



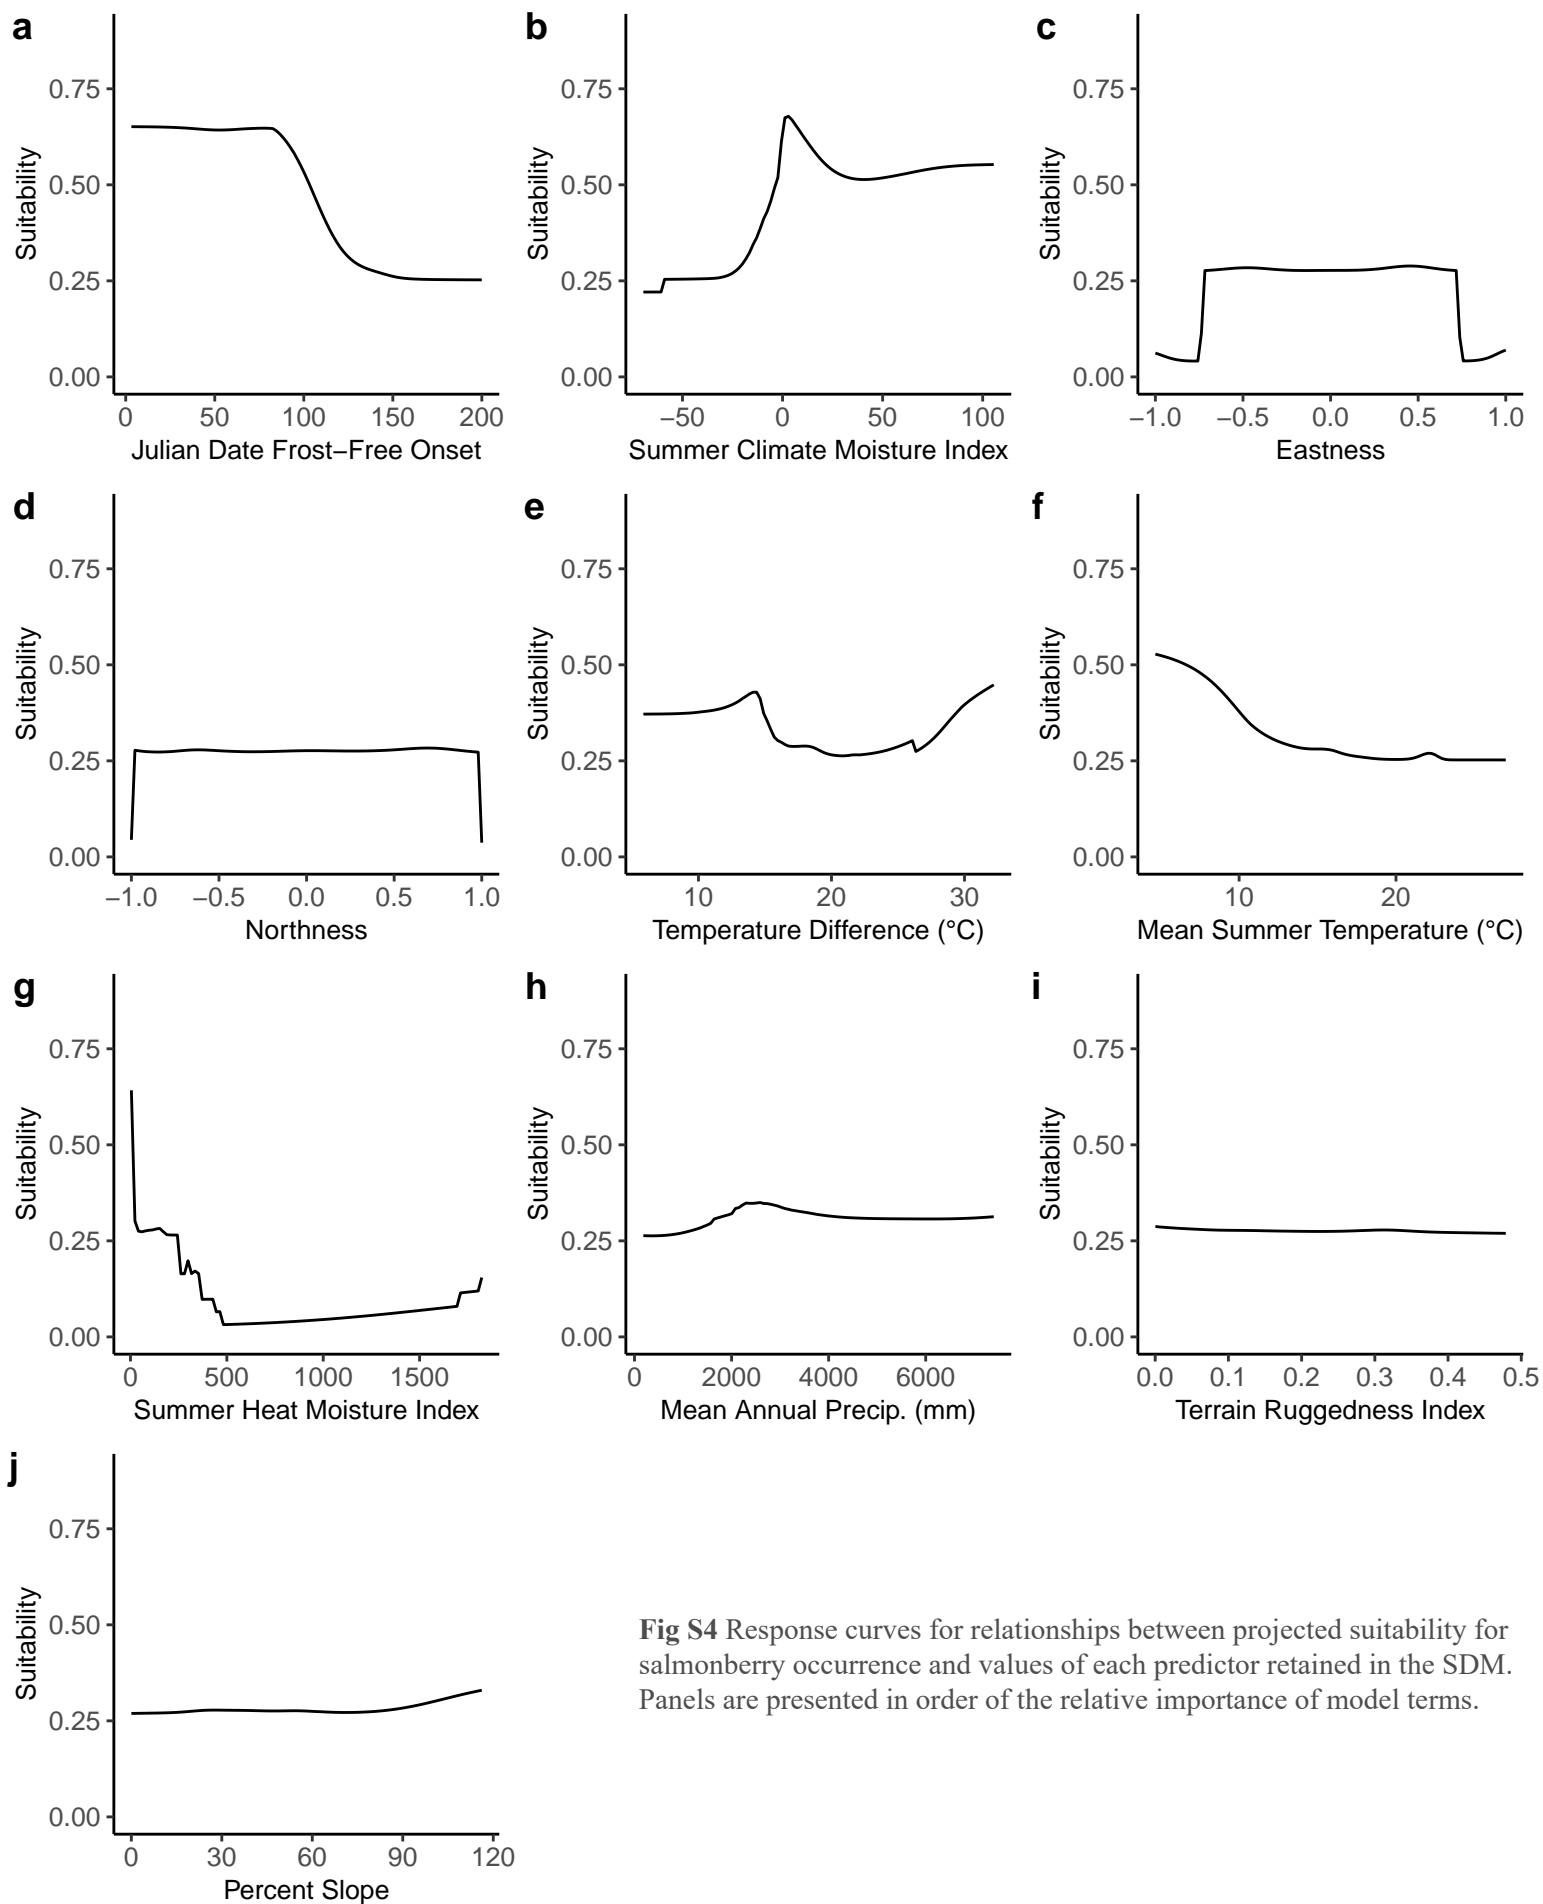

**Fig S4** Response curves for relationships between projected suitability for salmonberry occurrence and values of each predictor retained in the SDM. Panels are presented in order of the relative importance of model terms.



Climate Normals (1991–2020)

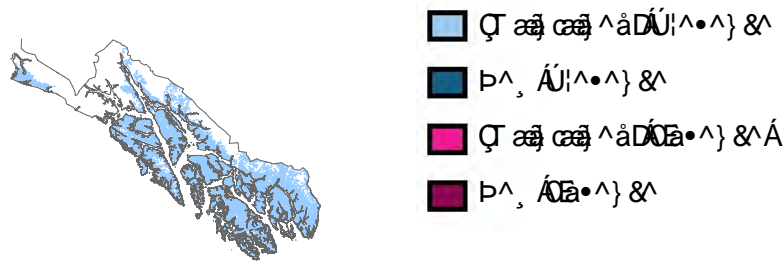

Normals vs. SSP2–4.5 (2050)      Normals vs. SSP3–7.0 (2050)      Normals vs. SSP5–8.5 (2050)

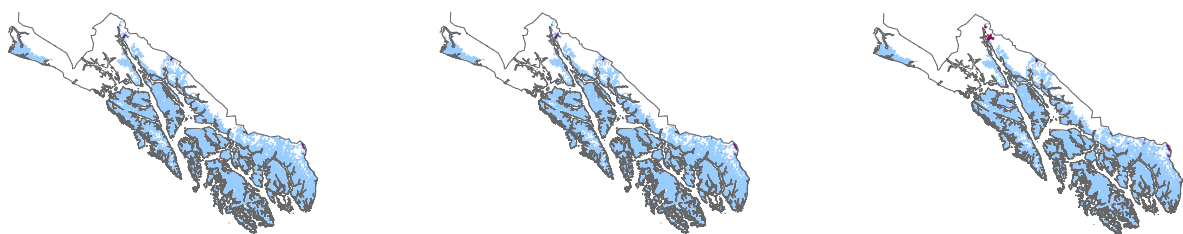

Normals vs. SSP2–4.5 (2075)      Normals vs. SSP3–7.0 (2075)      Normals vs. SSP5–8.5 (2075)

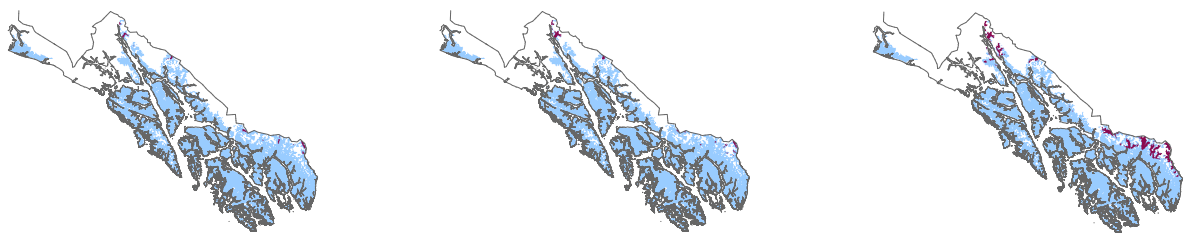

Normals vs. SSP2–4.5 (2100)      Normals vs. SSP3–7.0 (2100)      Normals vs. SSP5–8.5 (2100)

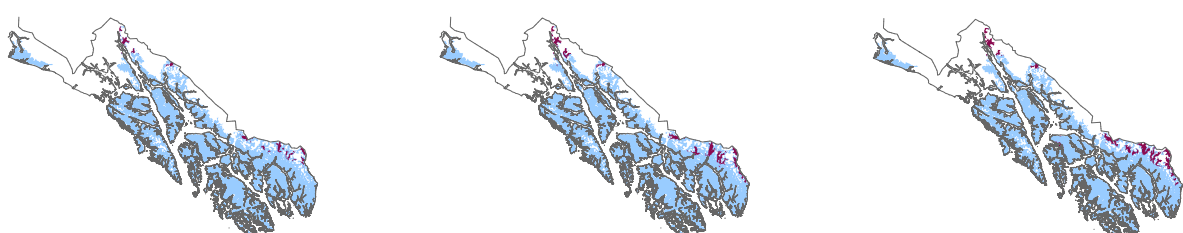

**Fig S5** Maps of model projections of binary suitability for blueberry occurrence in forested areas of the Tongass National Forest under historical climate normals and differences between projected binary suitability under historical climate normals and each SSP scenario (change in binary suitability for presence under each SSP) for all years examined.



# Climate Normals (1991–2020)

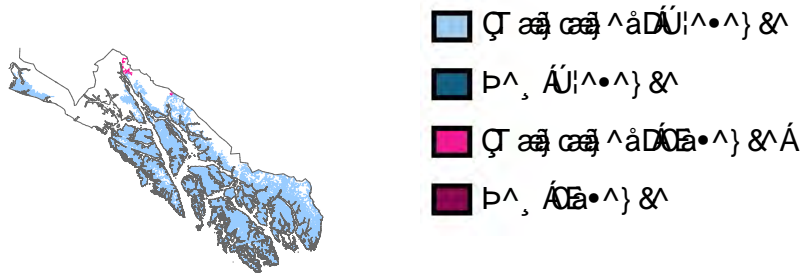

Normals vs. SSP2–4.5 (2050)

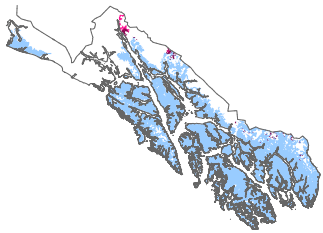

Normals vs. SSP3–7.0 (2050)

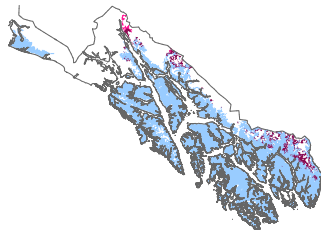

Normals vs. SSP5–8.5 (2050)

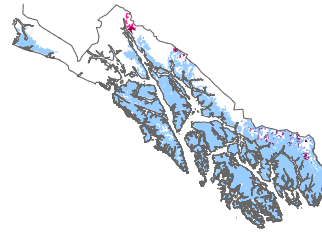

Normals vs. SSP2–4.5 (2075)

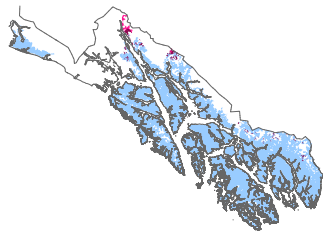

Normals vs. SSP3–7.0 (2075)

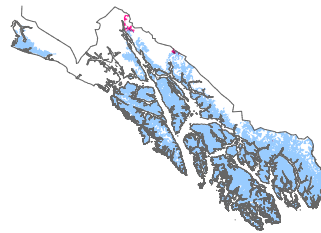

Normals vs. SSP5–8.5 (2075)

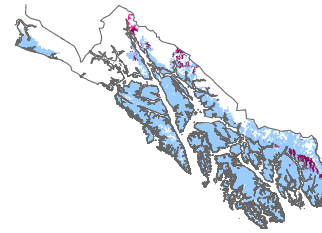

Normals vs. SSP2–4.5 (2100)

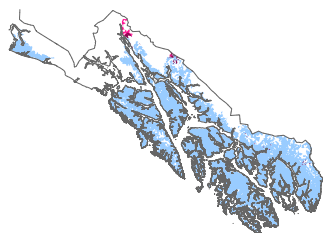

Normals vs. SSP3–7.0 (2100)

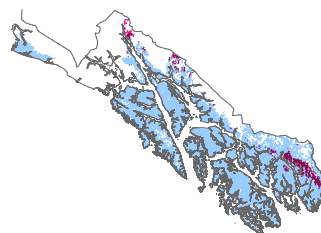

Normals vs. SSP5–8.5 (2100)

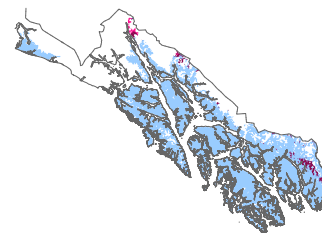

**Fig S6** Maps of model projections of binary suitability for salmonberry occurrence in forested areas of the Tongass National Forest under historical climate normals and differences between projected binary suitability under historical climate normals and each SSP scenario (change in binary suitability for presence under each SSP) for all years examined.



Climate Normals (1991–2020)

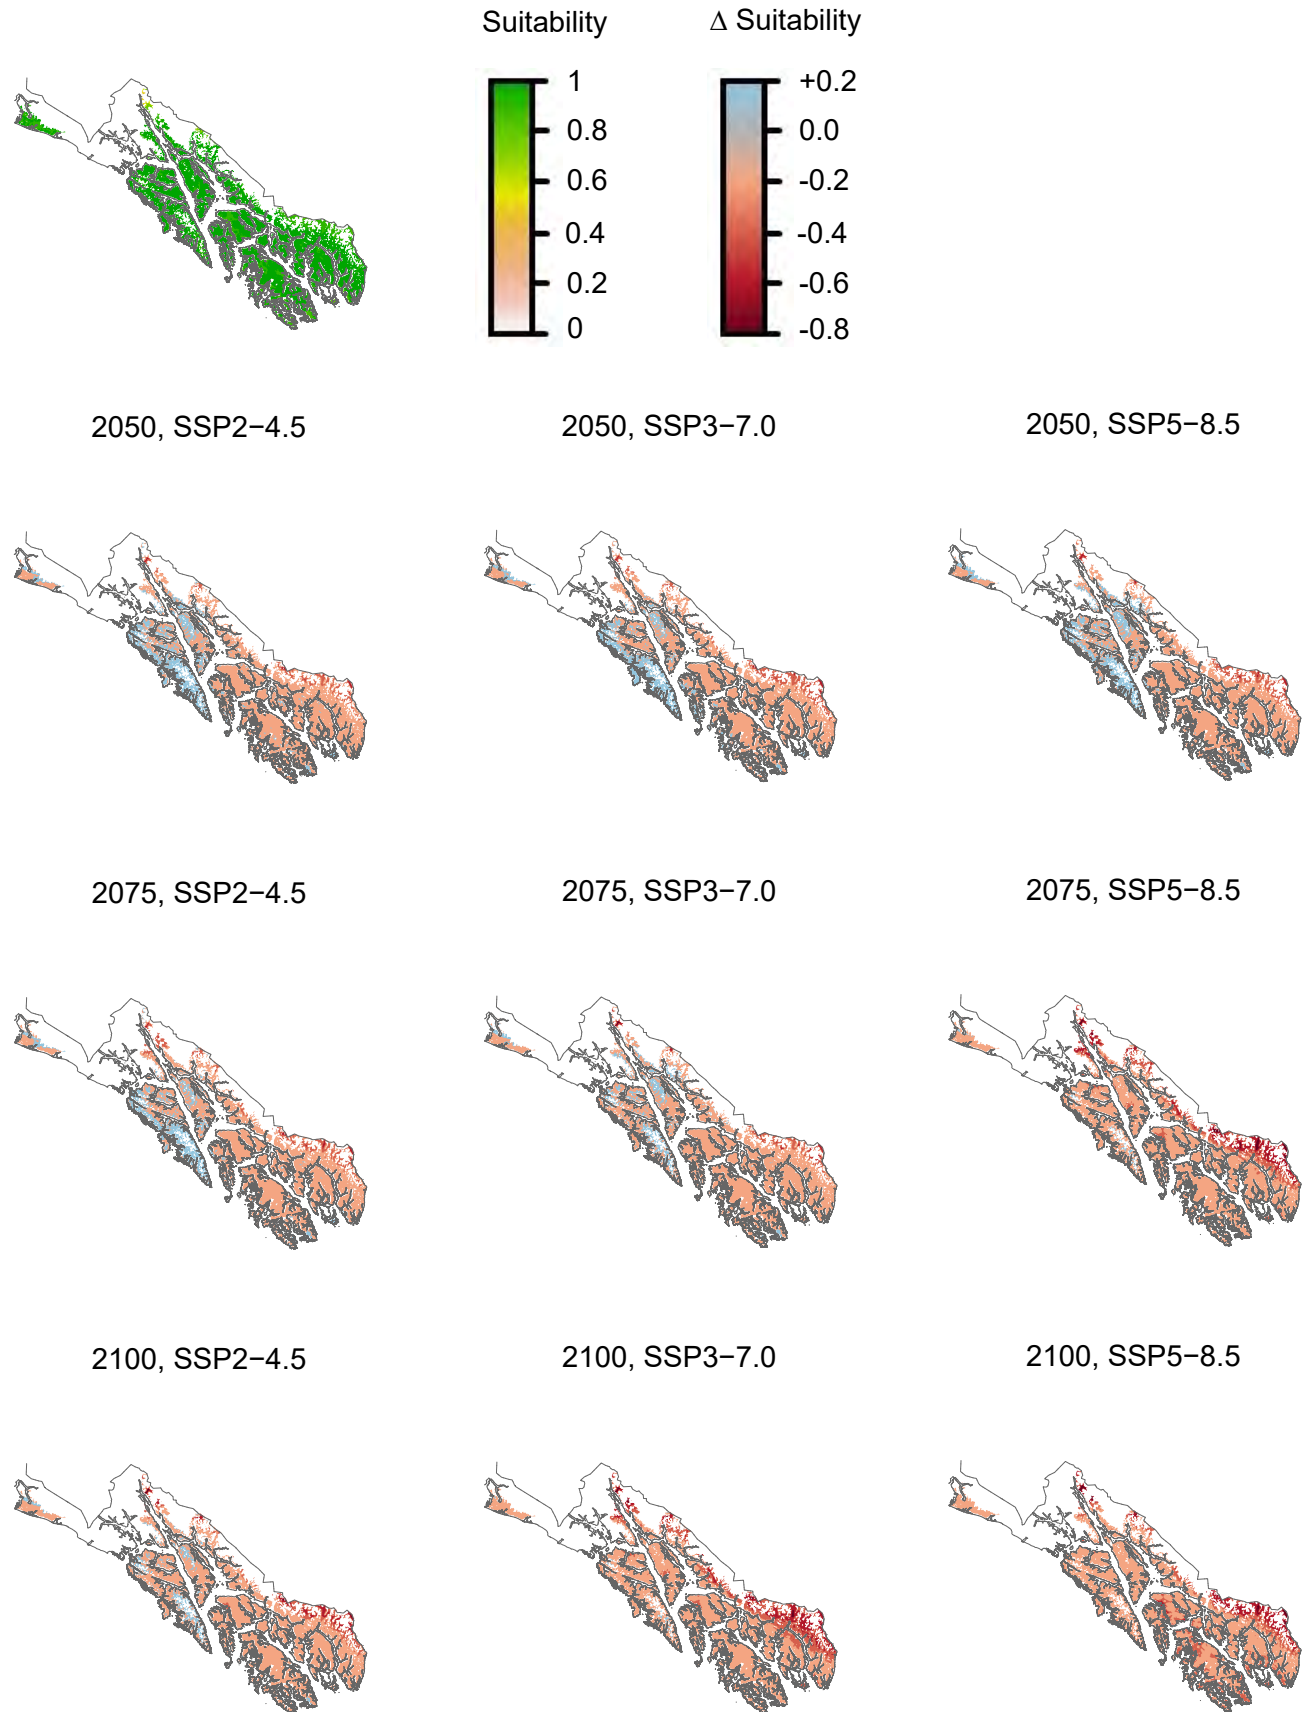

**Fig S7** Maps of model projections of continuous suitability for blueberry occurrence in forested areas of the Tongass National Forest under historical climate normals (Suitability) and change in projected suitability for historical climate normals versus each SSP scenario ( $\Delta$  Suitability) for all years examined.



Climate Normals (1991–2020)

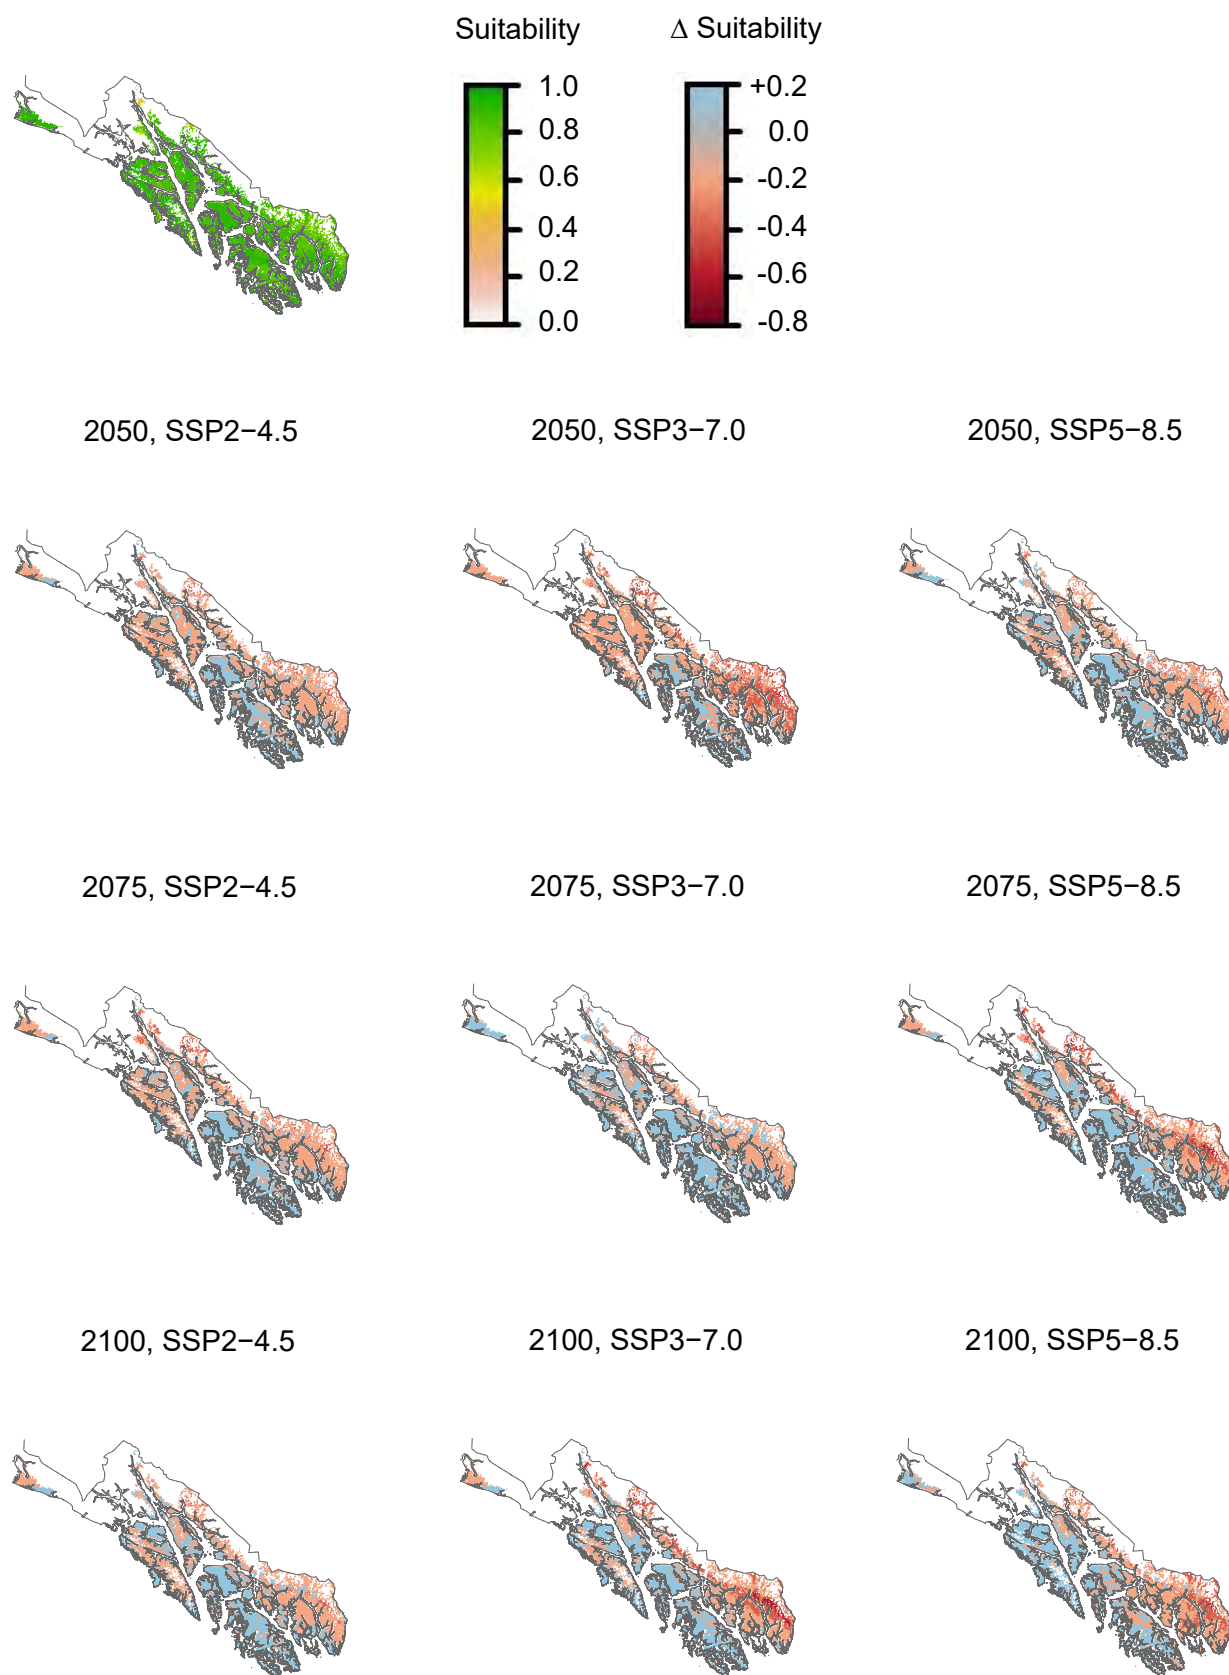

**Fig S8** Maps of model projections of continuous suitability for salmonberry occurrence in forested areas of the Tongass National Forest under historical climate normals (Suitability) and change in projected suitability for historical climate normals versus each SSP scenario ( $\Delta$  Suitability) for all years examined.



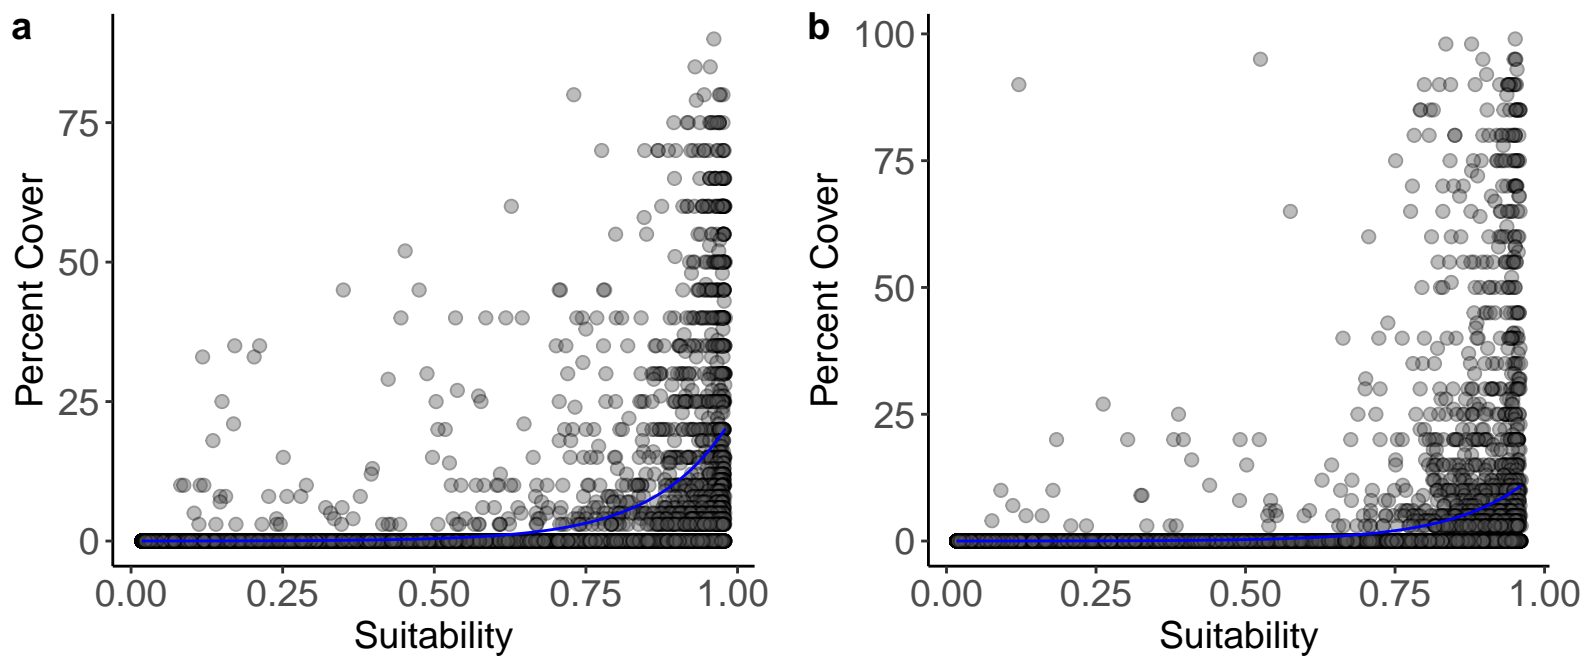

**Fig S9** Suitability for occurrence projected by ensemble SDMs vs. percent aerial cover as measured by FIA crews on all western U.S. FIA plots used for model training for (a) blueberry and (b) salmonberry. Blue lines represent fitted model predictions across suitability values.



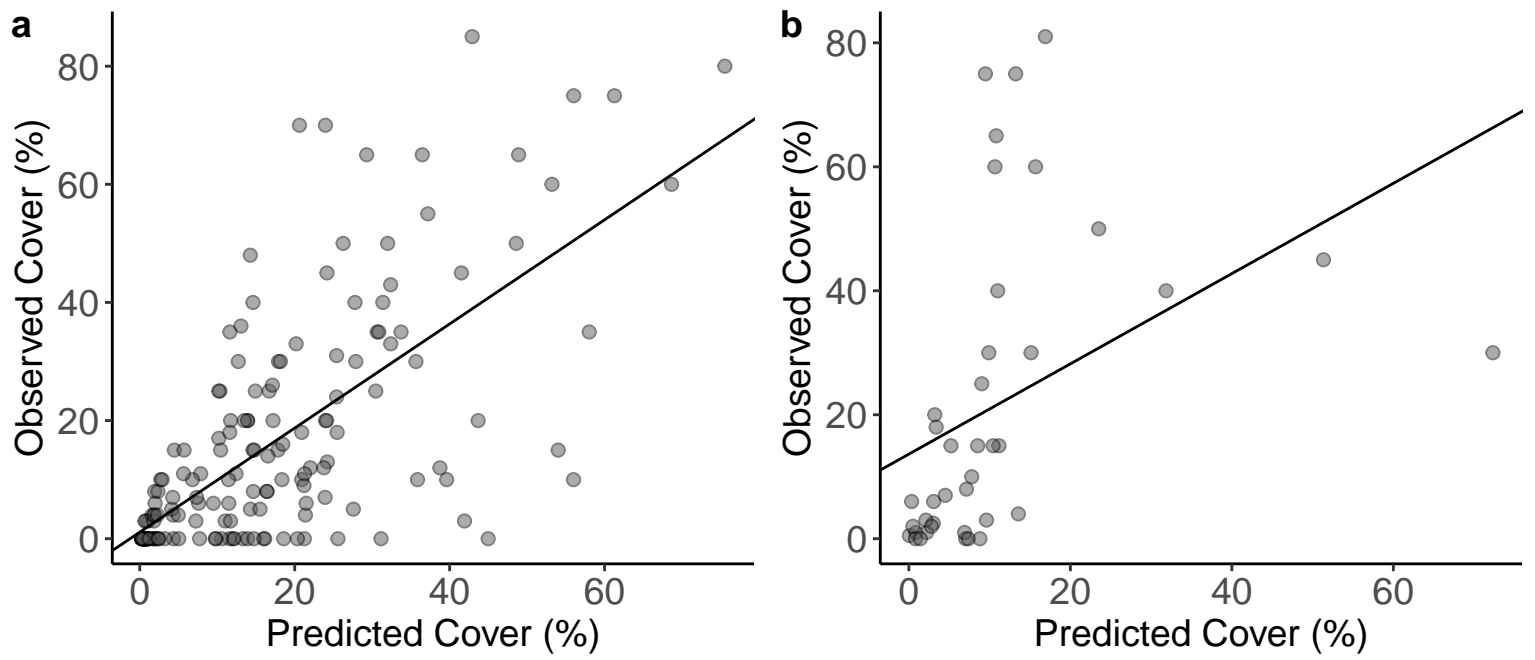

**Fig S10** Model-predicted blueberry cover vs. observed blueberry cover on (a) FIA plots in southeast Alaska withheld from model training for validation and (b) AYS plots in southeast Alaska.



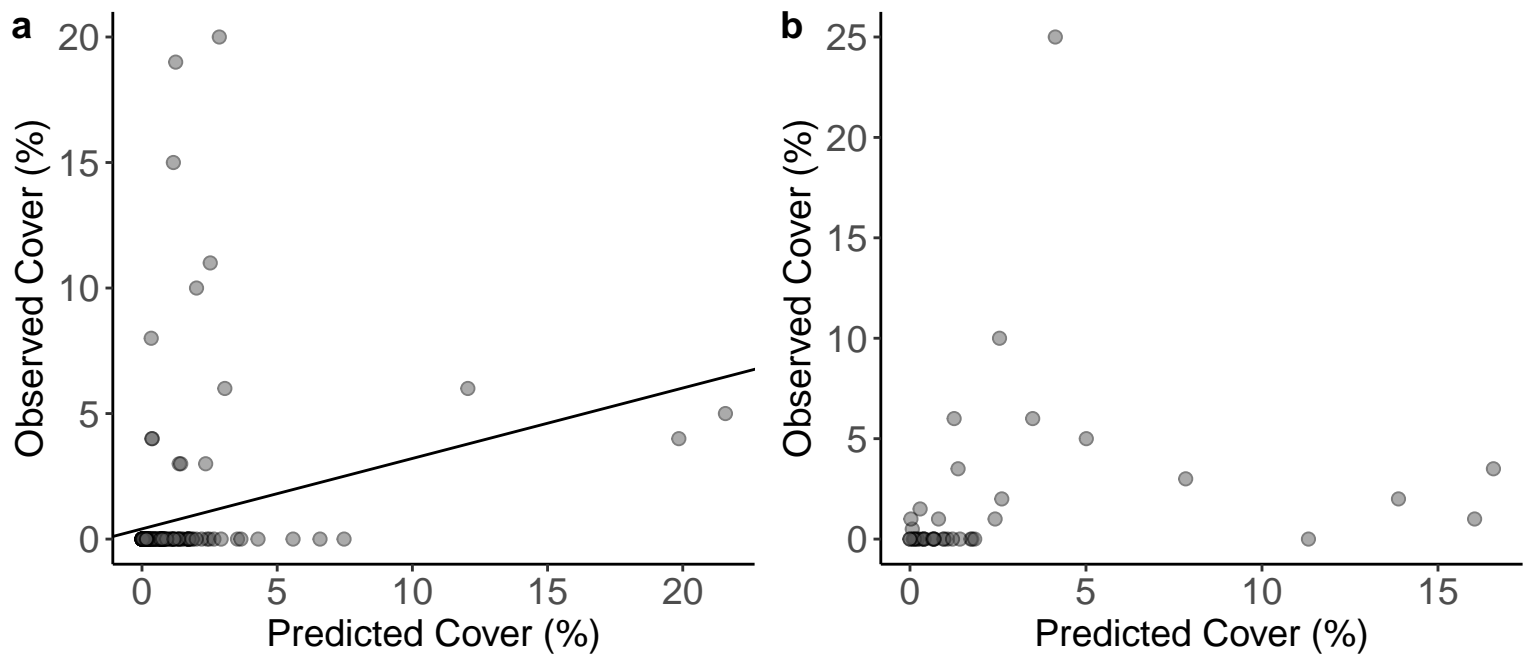

**Fig S11** Model-predicted salmonberry cover vs. observed salmonberry cover on (a) FIA plots in southeast Alaska withheld from model training for validation and (b) AYS plots in southeast Alaska.



### Generalized additive model for blueberry aerial cover excluding overall shrub cover as a predictor

When model term selection and GAMs were re-run without shrub cover as a predictor, model fit was poorer but still outperformed the null model, indicating that shrub cover was not solely responsible for the variation in blueberry cover explained by the model ( $\Delta AIC$ : -183.473; deviance explained: 25.7%;  $R^2_{adj}$  = 0.127). Terms included in the model lacking shrub cover as a predictor generally overlapped with those in the model that included shrub cover as a predictor, though the former did not include winter mean temperature or elevation and instead included the date of the end of the frost-free period, chilling degree days  $<0^\circ\text{C}$ , topographic roughness, and Hargreaves climatic moisture deficit (Table S3). Response plots for retained predictors are presented in Fig. S12 and comparisons of model predictions for blueberry cover vs. observed blueberry cover on FIA plots withheld for validation and AYS plots are presented in Fig. S13.

**Table S3** Relative importance values of all terms retained in the final GAM for blueberry aerial cover when the overall shrub cover term was excluded from the model selection process.

| Term                                   | Relative Importance |
|----------------------------------------|---------------------|
| Forest Type                            | 0.2905              |
| Date of End of Frost Free Period       | 0.2164              |
| Stand Size Class                       | 0.1390              |
| Growing Degree Days $>0^\circ\text{C}$ | 0.1194              |
| Stand Age Class                        | 0.0738              |
| Tree Cover                             | 0.0427              |
| Topographic Roughness Index            | 0.0098              |
| Climatic Moisture Defecit              | 0.0079              |



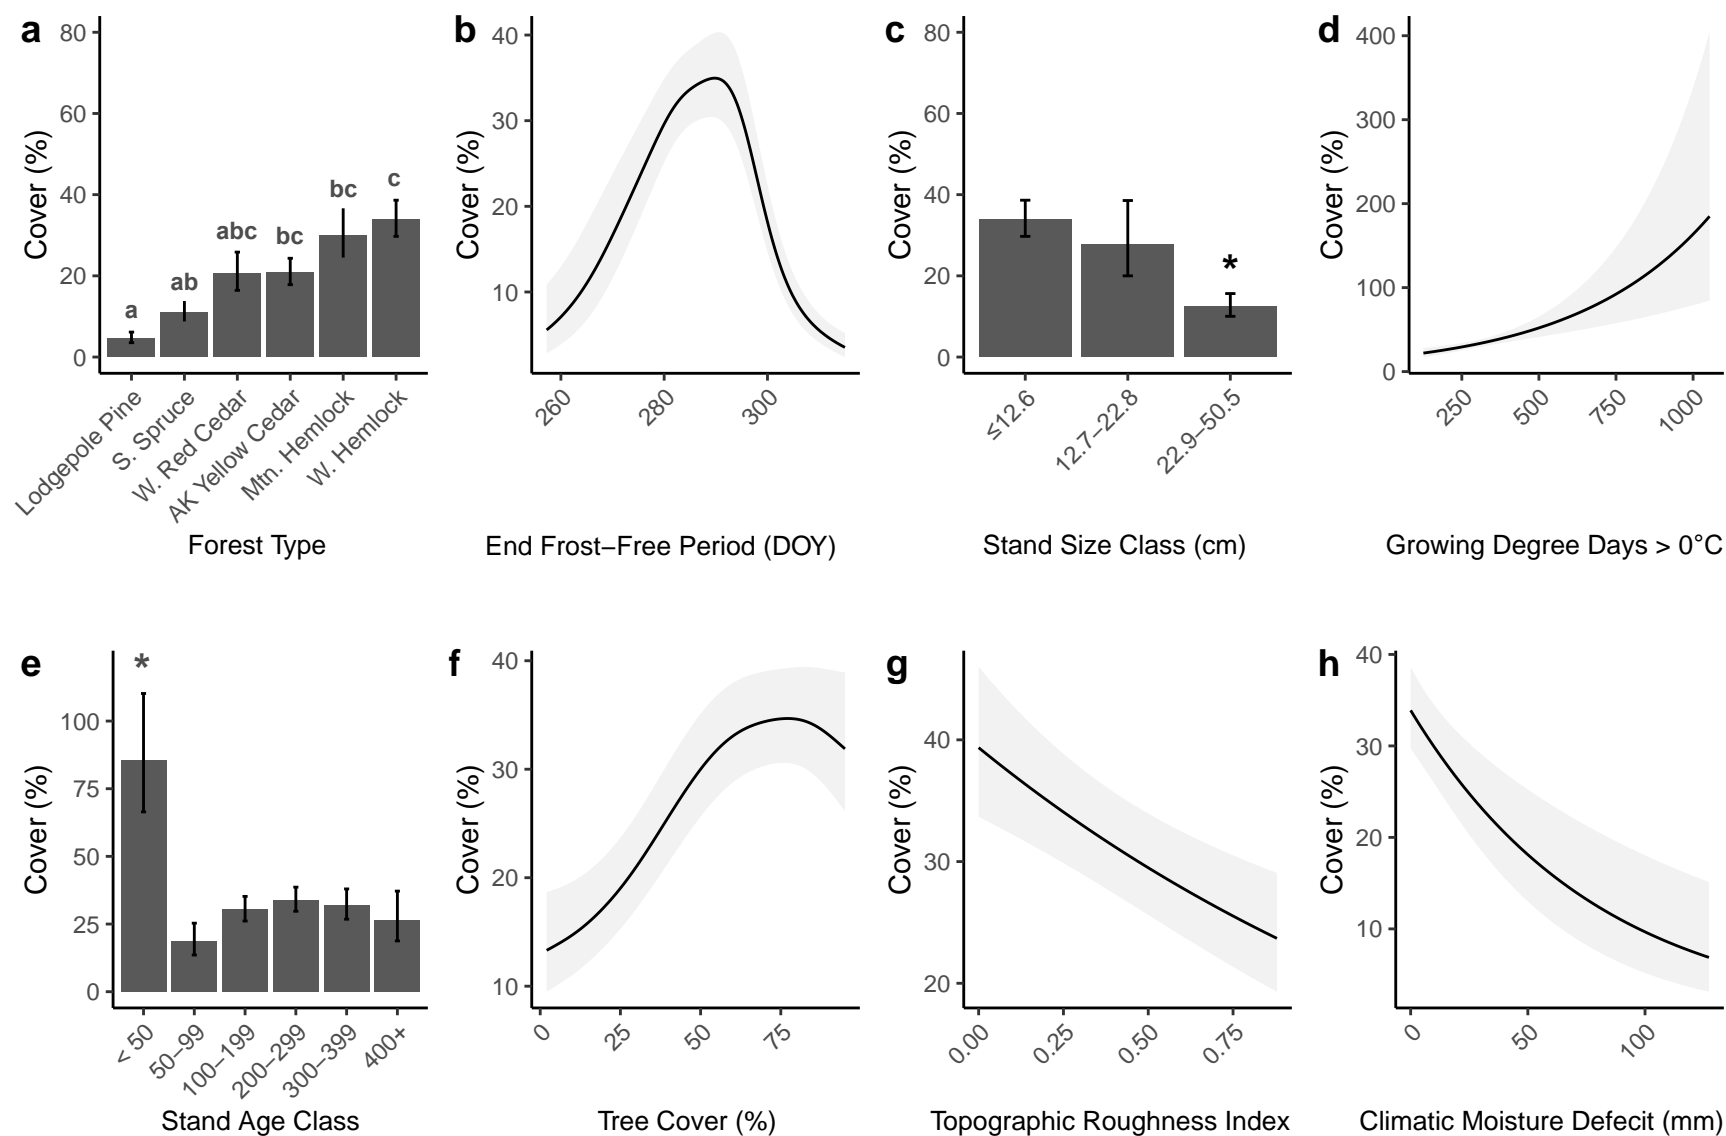

**Fig S12** Response curves for projected blueberry cover ( $\pm 1$  SE) across values of retained model parameters in the model lacking shrub cover as a predictor when other terms were held constant at their median (continuous predictors) or modal values (categorical predictors). Asterisks and letters indicate significant differences among levels of categorical variables at  $P < 0.05$ . Panels are presented in order of decreasing parameter importance in the model.



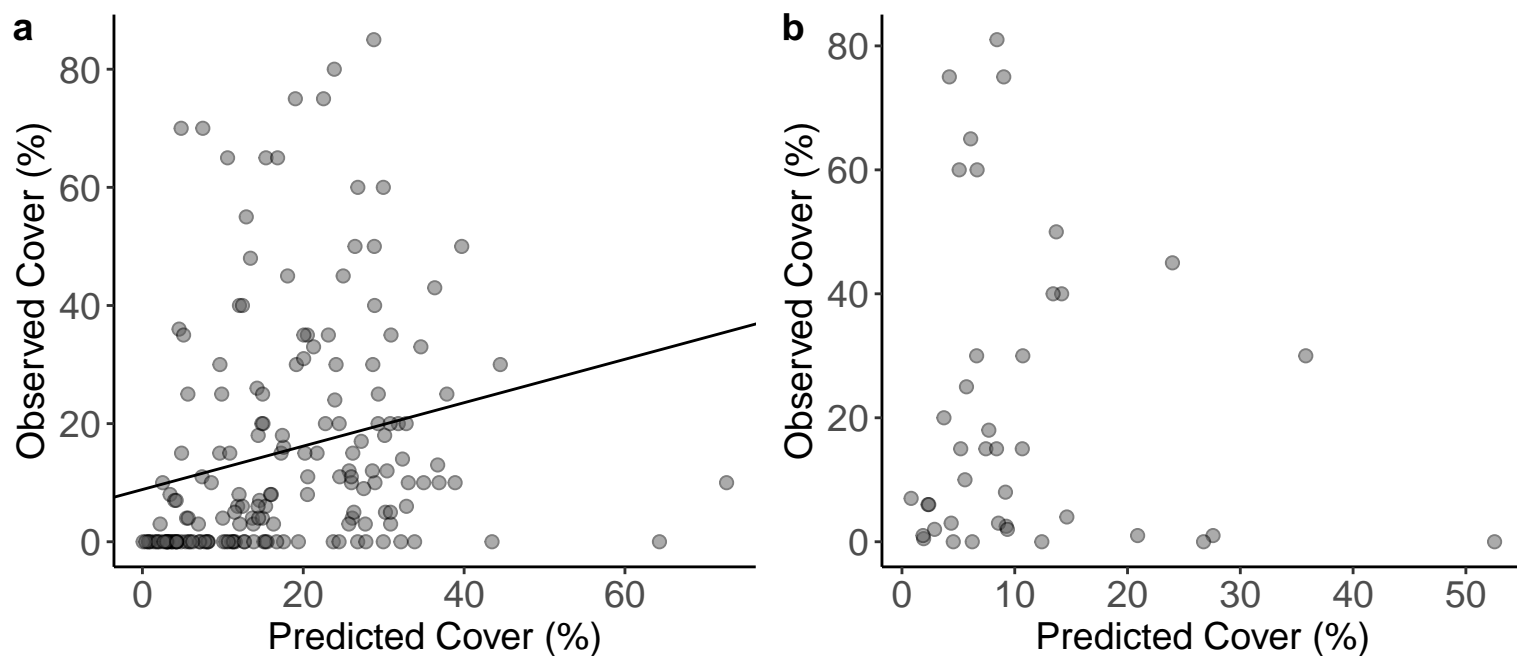

**Fig S13** Model-predicted blueberry cover vs. observed blueberry cover on (a) FIA plots in southeast Alaska withheld from model training for validation and (b) AYS plots in southeast Alaska for the GAM lacking shrub cover as a predictor.
